# Supplementary material
Source: Springer Nature journal article supplement (https://www.springermedizin.de/resource/supplementary/12936_2009_891_MOESM14_ESM.pdf/9548478)

### Jungle

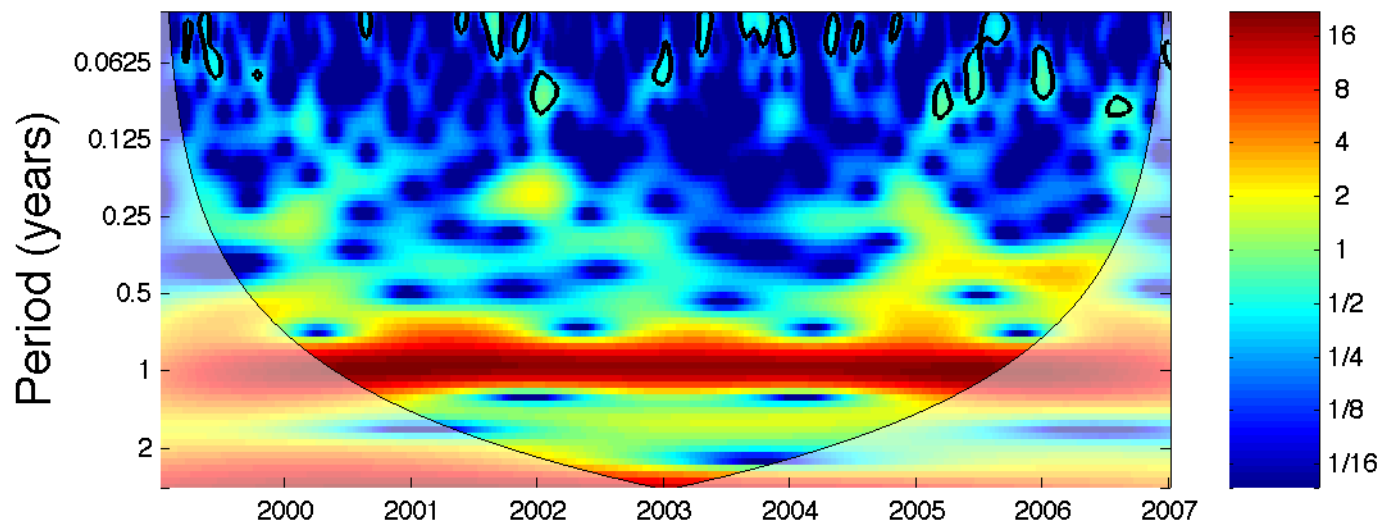

### Coast

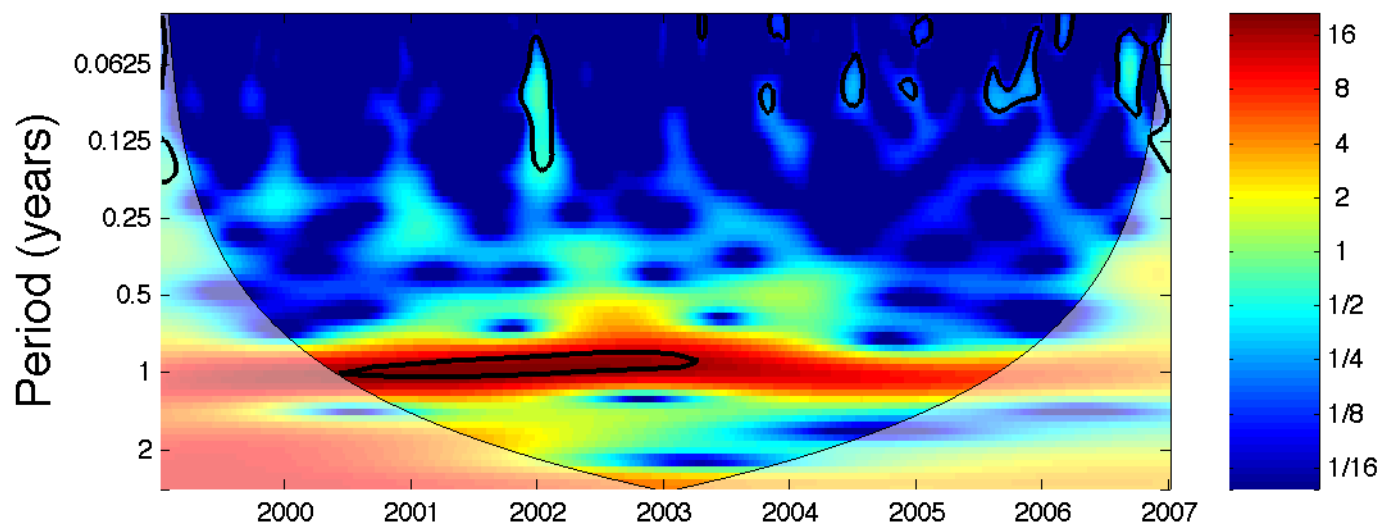

### Mountain

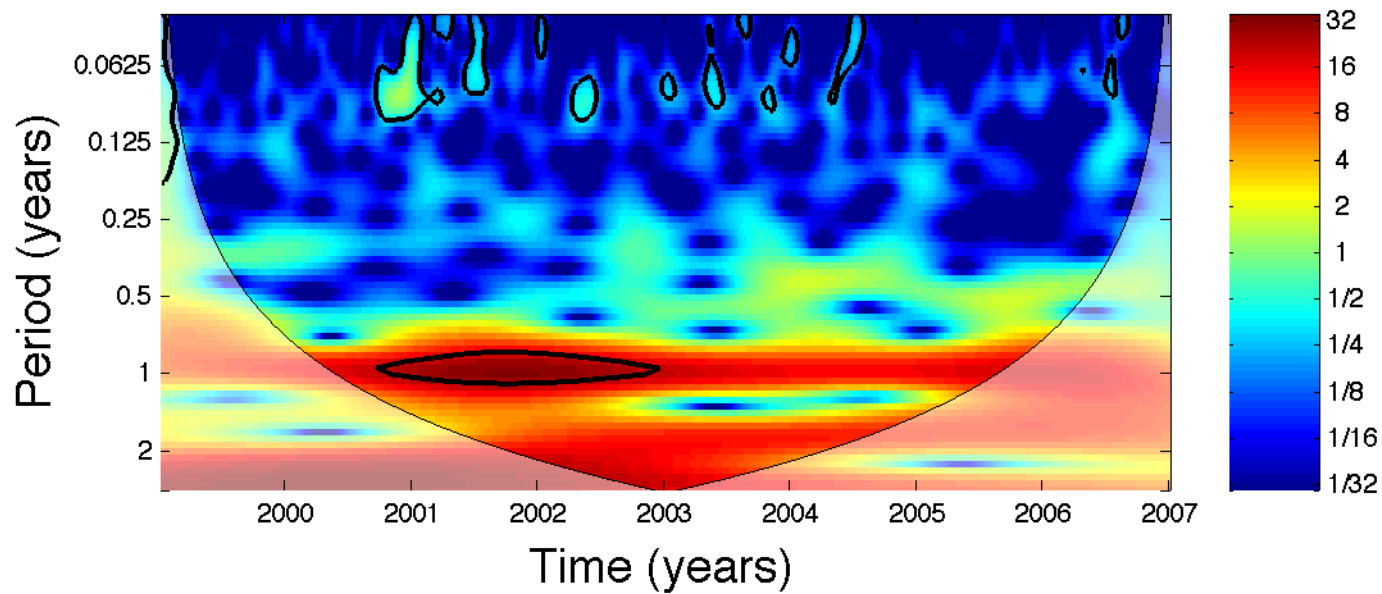

Supplement: MOESM14 [file 9548478]
